# Supplementary material for: Taxonomic Diversity of the Microbial Biofilms Collected along the Thermal Streams on Kunashir Island
Source: MDPI journal article supplement (doi:10.3390/ecologies4010009), 2023-02-10
Supplement: s1 [file s1]

Archive with 3 entries (3 files):
- Figure S1.pdf
- Supplementary Table S1.pdf
- Supplementary Table S2.pdf
