# Supplementary material for: Taxonomic Diversity of the Microbial Biofilms Collected along the Thermal Streams on Kunashir Island
Source: MDPI journal article supplement (doi:10.3390/ecologies4010009), 2023-02-10
Supplement: s1 [file s1 › Supplementary Table S1.pdf]

**Table S1.** The chemical composition of thermal waters of the studied hot spring in the Stolbovskie springs. Extracted from [20].

| <b>Components</b>                  | <b>Concentration</b> |
|------------------------------------|----------------------|
| Dissolved<br>gases                 | (mol %)              |
| <b>CO<sub>2</sub></b>              | <b>29.1</b>          |
| <b>N<sub>2</sub></b>               | <b>56.0</b>          |
| <b>O<sub>2</sub></b>               | <b>8.24</b>          |
| <b>CH<sub>4</sub></b>              | <b>5.42</b>          |
| Elements<br>and ions               | (mg/L)               |
| <b>SiO<sub>2</sub></b>             | <b>169</b>           |
| <b>Na<sup>+</sup></b>              | <b>684</b>           |
| <b>K<sup>+</sup></b>               | <b>46</b>            |
| <b>Ca<sup>+</sup></b>              | <b>112</b>           |
| <b>Mg<sup>2+</sup></b>             | <b>10</b>            |
| <b>F<sup>-</sup></b>               | <b>0.91</b>          |
| <b>Cl<sup>-</sup></b>              | <b>1023</b>          |
| <b>SO<sub>4</sub><sup>2-</sup></b> | <b>431</b>           |
| <b>HCO<sub>3</sub><sup>-</sup></b> | <b>240</b>           |
| <b>B</b>                           | <b>3.0</b>           |
| <b>Fe</b>                          | <b>0.03</b>          |
| <b>Al</b>                          | <b>0.03</b>          |
|                                    | ( $\mu$ g/L)         |
| <b>Sr</b>                          | <b>1067</b>          |
| <b>Ba</b>                          | <b>88</b>            |
| <b>Rb</b>                          | <b>131</b>           |
| <b>Li</b>                          | <b>368</b>           |
| <b>Cs</b>                          | <b>45</b>            |
