# Supplementary material for: Taxonomic Diversity of the Microbial Biofilms Collected along the Thermal Streams on Kunashir Island
Source: MDPI journal article supplement (doi:10.3390/ecologies4010009), 2023-02-10
Supplement: s1 [file s1 › Supplementary Table S2.pdf]

**Table S2.** Statistical data of the analysis of amplicons.

|                 | <b>Total<br/>number of<br/>reads</b> | <b>Median<br/>number of<br/>reads</b> | <b>Average<br/>number of<br/>reads</b> | <b>Number of<br/>ASVs</b> | <b>Number of<br/>singletons</b> | <b>Average<br/>sequence<br/>length</b> |
|-----------------|--------------------------------------|---------------------------------------|----------------------------------------|---------------------------|---------------------------------|----------------------------------------|
| <b>Bacteria</b> | 449694                               | 20816                                 | 18737                                  | 1628                      | 177                             | 417                                    |
| <b>Archaea</b>  | 17342                                | 993                                   | 1445                                   | 87                        | 2                               | 339                                    |
| <b>Protists</b> | 171722                               | 3432                                  | 7155                                   | 562                       | 58                              | 382                                    |
