# Supplementary figures and images for: Taxonomic Diversity of the Microbial Biofilms Collected along the Thermal Streams on Kunashir Island
Source: MDPI journal article supplement (doi:10.3390/ecologies4010009), 2023-02-10

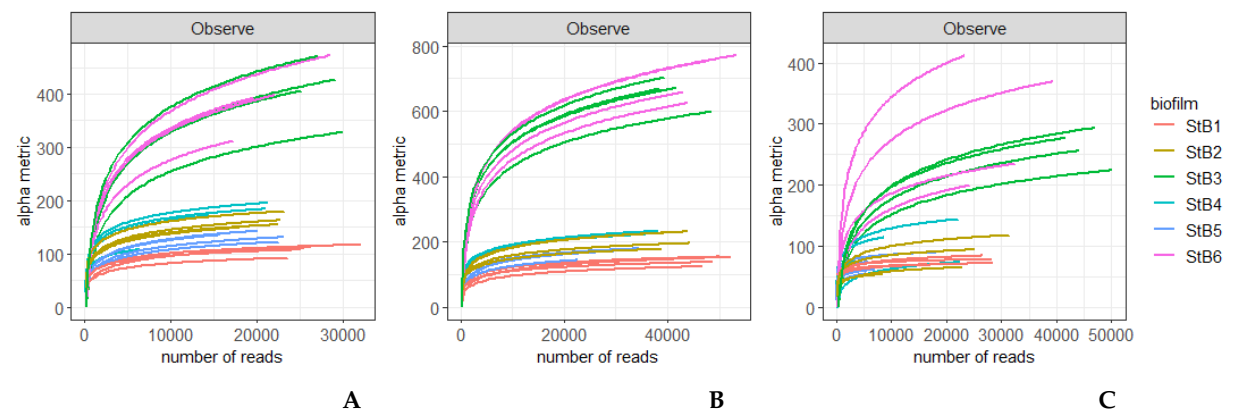

**Figure S1.** Rarefaction curves built for bacterial (A), archaeal (B) and protists (C) reads.

Supplement: s1 [file s1 › Figure S1.pdf]
